# Supplementary material for: Internet and Social Media Access Among Youth Experiencing Homelessness: Mixed-Methods Study
Source: PubMed Central journal article supplement (PMC5989062; doi:10.2196/jmir.9306), 2018-05-22
Supplement: jmir_v20i5e184_app3.pdf [file jmir_v20i5e184_app3.pdf]

### Multimedia Appendix 3: GEE model results

GEE model results for Internet access frequency, time spent using the Internet, social media use, and access to a smartphone regressed on homelessness status, adjusted for age, male gender, and sexual orientation.

| Characteristic                   | Internet access frequency<br>(≥ once/day vs. < once/day) |           |         | Time spent using the Internet<br>(more vs. less) |           |         | Use of social media<br>(yes vs. no) |           |         | Access to a smartphone<br>(yes vs. no) |           |         |
|----------------------------------|----------------------------------------------------------|-----------|---------|--------------------------------------------------|-----------|---------|-------------------------------------|-----------|---------|----------------------------------------|-----------|---------|
|                                  | OR                                                       | 95% CI    | P value | OR                                               | 95% CI    | P value | OR                                  | 95% CI    | P value | OR                                     | 95% CI    | P value |
| <b>Homelessness Status</b>       |                                                          |           |         |                                                  |           |         |                                     |           |         |                                        |           |         |
| While experiencing homelessness  | 0.32                                                     | 0.18-0.57 | <.001   | 0.25                                             | 0.16-0.41 | <.001   | 0.13                                | 0.03-0.55 | .01     | 0.33                                   | 0.18-0.60 | <.001   |
| Before experiencing homelessness | REF                                                      | REF       |         | REF                                              | REF       |         | REF                                 | REF       |         | REF                                    | REF       |         |
| <b>Age</b>                       |                                                          |           |         |                                                  |           |         |                                     |           |         |                                        |           |         |
| Age                              | 1.32                                                     | 0.96-1.83 | .09     | 1.10                                             | 0.83-1.46 | .50     | 1.21                                | 0.75-1.96 | .44     | 0.88                                   | 0.61-1.26 | .49     |
| <b>Male Gender</b>               |                                                          |           |         |                                                  |           |         |                                     |           |         |                                        |           |         |
| Yes                              | 0.57                                                     | 0.27-1.17 | .13     | 0.69                                             | 0.36-1.31 | .26     | 1.24                                | 0.41-3.76 | .71     | 1.03                                   | 0.45-2.37 | .94     |
| No                               | REF                                                      | REF       |         | REF                                              | REF       |         | REF                                 | REF       |         | REF                                    | REF       |         |
| <b>Sexual Orientation</b>        |                                                          |           |         |                                                  |           |         |                                     |           |         |                                        |           |         |
| Heterosexual                     | 0.40                                                     | 0.10-1.52 | .18     | 2.76                                             | 1.04-7.34 | .04     | 1.63                                | 0.44-6.03 | .47     | 0.68                                   | 0.20-2.32 | .53     |
| Not Heterosexual                 | REF                                                      | REF       |         | REF                                              | REF       |         | REF                                 | REF       |         | REF                                    | REF       |         |

Note: REF=reference category, OR=odds ratio, 95% CI=95% confidence interval
